# Supplementary material for: Direct and transgenerational effects of low doses of perinatal di-(2-ethylhexyl) phthalate (DEHP) on social behaviors in mice
Source: PLoS One. 2017 Feb 15;12(2):e0171977. doi: 10.1371/journal.pone.0171977 (PMC5310861; doi:10.1371/journal.pone.0171977)
Supplement: S2 Table — F statistics, degrees of freedom, and p values for each effect for the analyses of F1, F3, and F1 vs. F3 for social grooming, crawl, approach, circling, self-grooming alone, and jumping. (XLSX) [file pone.0171977.s002.xlsx]

## Sheet: S2 Table
Social Interactions	Generation	F1						F3
Two-way ANOVA, by generation	Factor	Dose		Sex		Dose x Sex		Dose		Sex		Dose x Sex
	(df1, df2)	F(3,98)=	p value	F(1,98)=	p value	F(3,98)=	p value	F(2,46)=	p value	F(1,46)=	p value	F(2,46)=	p value
	Social Grooming	1.55	0.21	1.49	0.23	4.53	0.005	5.38	0.009	0.04	0.85	0.36	0.7
	Follow	0.4	0.755564	0.06	0.807879	0.17	0.91498	0.06	0.940779	0	0.999656	1.68	0.199063
	Crawl	1.56	0.205507	1.77	0.186325	2.28	0.084779	1.6	0.214334	4.84	0.03	7.86	0.001
	Approach	4.48	0.006	1.64	0.203299	0.58	0.628367	0.16	0.849853	0.01	0.925076	0.08	0.920166
	Circling	1.88	0.13814	4.19	0.04	3.32	0.02	0.48	0.621095	0.13	0.725497	1.76	0.185916
	Self-Grooming Alone	3.25	0.03	0.68	0.410204	0.2	0.895804	0.71	0.499845	31.42	0.000002	1.48	0.240139
	Jumping	0.2	0.89522	0.06	0.804834	1.05	0.375066	1.31	0.282164	0.04	0.835903	0.05	0.94916
Social Interactions	Generation	F1 F3 Comparison
Three-way ANOVA	Factor	Dose		Sex		Dose x Sex		Generation		Dose x Generation		Sex x Generation		Three-Way Interaction
	(df1, df2)	F(2,135)=	p value	F(1,135)=	p value	F(2,135)=	p value	F(1,135)=	p value	F(2,135)=	p value	F(1,135)=	p value	F(2,135)=	p value
	Social Grooming	7.68	0.0007	0	0.96	2.34	0.1	25.43	2e-06	2.72	0.07	0.17	0.68	1.92	0.15
	Follow	0.29	0.745186	0.02	0.900197	1.29	0.278171	0.13	0.716605	0.1	0.903981	0.02	0.899655	1	0.37
	Crawl	2.63	0.076729	8.03	0.005	8.39	0.0004	0.43	0.512054	0.02	0.982283	0.04	0.847429	1.35	0.264494
	Approach	0.71	0.491801	0.37	0.546547	0.12	0.886137	3.64	0.058831	1.81	0.167836	0.64	0.42714	0.34	0.714354
	Circling	0.46	0.631444	1.42	0.236307	1.6	0.207352	10.75	0.001	1.59	0.208624	0.5	0.481591	4.31	0.02
	Self-Grooming Alone	0.64	0.528557	21.28	0.00001	0.7	0.500888	21.49	0.00001	2.29	0.105834	28.81	0.000000	1.73	0.18262
	Jumping	0.07	0.931633	0.29	0.591599	0.31	0.733	0.48	0.491088	0.94	0.391781	0.59	0.444549	0.34	0.715867
